# Supplementary material for: Construction of a prognostic signature associated with liver metastases for prognosis and immune response prediction in colorectal cancer
Source: Front Oncol. 2023 Jul 26;13:1234045. doi: 10.3389/fonc.2023.1234045 (PMC10411999; doi:10.3389/fonc.2023.1234045)
Supplement: Supplementary file 4 [file Table_3.xlsx]

## Sheet: Sheet1
Sample	HAMP	COLEC11	MMP3	UGT2B7	C8G	SERPINA1	IFITM10				Gene	Coefi
TCGA-AA-3524	2.80735	0	9.84862	5.52356	3.45943	11.3432	2				HAMP	0.00408911
TCGA-AG-3580	2.80735	3.70044	9.90087	8.62936	3.58496	14.5264	4.08746				COLEC11	0.0348335
TCGA-AA-3534	2.80735	3.32193	11.3264	9.52552	3.45943	12.352	4.08746				MMP3	-0.0464946
TCGA-AA-3955	1	3.32193	8.55075	4.64386	3.58496	11.2709	2				UGT2B7	-0.0671623
TCGA-AG-A015	0	3.45943	9.41785	7.11894	3.16993	13.0091	3.70044				C8G	0.0711776
TCGA-CK-4952	3	3	9.84549	12.0681	4.08746	16.7644	6.08746				SERPINA1	-0.0729731
TCGA-AA-A01I	2	4.16993	9.53528	8.01123	2	13.7594	5.04439				IFITM10	0.240419
TCGA-AA-3519	1	4.75489	10.0334	6.72792	4.90689	13.8248	4.16993
TCGA-AA-3560	0	3.45943	10.3783	5.52356	2.58496	14.9763	5.2854
TCGA-AG-A008	2.80735	4.24793	8.73471	5.90689	4.32193	14.9959	4.52356
TCGA-SS-A7HO	1	4.85798	7.91289	4.85798	5.12928	11.8053	2.80735
TCGA-AA-3561	2	3.80735	8.10329	6.72792	4.52356	12.6448	4
TCGA-AG-3578	0	2.58496	10.007	10.9114	4.70044	15.34	6.52356
TCGA-AA-3861	1	2.32193	6.33985	9.39874	4.16993	15.3006	5.58496
TCGA-AG-3583	0	4.52356	10.5048	5.61471	5.04439	14.8645	4.70044
TCGA-AA-3947	0	0	10.4252	3.58496	2	11.0196	4.52356
TCGA-AA-A01F	1.58496	1.58496	7.3837	4.08746	8	13.9733	3
TCGA-AA-3844	1	6.35755	9.88111	5.75489	4.52356	15.2192	4.70044
TCGA-AG-3887	2	2.80735	10.1662	5	3.58496	13.0798	4.70044
TCGA-AF-3400	4.52356	4.08746	13.3727	9.82337	4.9542	15.5362	6.79442
TCGA-DC-6160	2.32193	2	12.4192	6.88264	5.49185	13.0191	5.20945
TCGA-EI-6512	3.45943	2.80735	10.4378	9.14211	5.49185	16.2276	6.30378
TCGA-AA-3972	0	3.32193	10.255	4.52356	4.16993	13.4531	4.52356
TCGA-AA-A00U	1.58496	3.58496	10.1662	6.02237	4.16993	13.7568	4.9542
TCGA-AA-3854	3	3.58496	10.0154	6.79442	5.67243	16.1746	5.45943
TCGA-AY-6197	0	4	14.4704	5.97728	7.02237	16.3183	5.72792
TCGA-CM-4746	2.80735	2.58496	9.8392	7.02237	3.32193	15.6674	6.18982
TCGA-AA-A00W	1	2.80735	9.80735	6	4.58496	14.3558	5.16993
TCGA-DM-A28K	3	3.90689	9.32418	10.4553	4.58496	15.4964	6.47573
TCGA-AA-3819	0	3.16993	10.5108	7.35755	5.20945	12.3024	4.85798
TCGA-DC-5337	2.80735	3.32193	10.0126	6.9542	4.9542	13.8251	5.12928
TCGA-AA-3509	2	3.90689	11.1434	6.40939	4.85798	12.9887	4.90689
TCGA-AA-3667	1.58496	3	8.39232	4.08746	4.45943	10.3026	3.16993
TCGA-F4-6808	1	8.57365	9.78953	7.43463	5.64386	14.864	4.64386
TCGA-AG-3894	1	4.24793	10.5127	10.7797	3.90689	11.8746	5.9542
TCGA-AA-3976	0	2	8.32643	4.90689	4.64386	11.0881	3.80735
TCGA-AA-3989	2.58496	3.16993	10.446	6.58496	3.16993	12.4676	5.39232
TCGA-AY-A54L	1.58496	4	9.93811	8.86419	4.58496	14.0105	5.88264
TCGA-G4-6306	2	2.58496	11	10.0539	7.32193	14.0177	5.83289
TCGA-AA-3680	1.58496	3.58496	5.45943	8.12412	4.85798	12.5708	4.39232
TCGA-AA-A00N	3.16993	2	11.9311	8.54689	4.16993	14.4795	6.78136
TCGA-AG-A02X	0	3.58496	8.47978	5.90689	4.45943	14.585	5.16993
TCGA-A6-2674	5.67243	6.56224	12.1118	7.40088	4.20945	14.5658	5.83289
TCGA-AG-A016	0	1	8.224	4.32193	3.32193	11.2216	4.39232
TCGA-AA-3950	3.16993	6.06609	12.4378	8.32643	3.45943	15.7411	6.88264
TCGA-AA-3855	0	2.58496	10.6484	7.24793	5.85798	13.218	5.32193
TCGA-AG-3586	2.32193	2.58496	9.60733	7.9542	5.45943	13.4633	5.49185
TCGA-AA-A02H	2	2.80735	6.44294	3.80735	2.32193	9.62022	3.45943
TCGA-AA-3538	3.32193	5.2854	8.86419	8.45533	3.90689	11.0396	4.80735
TCGA-AD-6888	1.58496	6.47573	11.7611	9.23362	7.43463	17.0704	6.24793
TCGA-AZ-4315	2.58496	2.32193	7.30378	8.20945	4.08746	10.8971	4.80735
TCGA-AG-3591	2.32193	5.12928	9.05799	9.31288	5.49185	15.1949	5.9542
TCGA-CM-5864	1	4.39232	11.1183	7.12928	5.64386	15.0246	5.80735
TCGA-AA-3522	3	4.24793	5.67243	8.00562	3.70044	13.8084	5.20945
TCGA-AA-3696	2.58496	3	3.58496	5.49185	3.45943	10.7936	3.45943
TCGA-AA-A010	3.45943	2	8.40088	6.89482	3	9.98299	4.80735
TCGA-AA-3555	2	3.45943	11.0634	6.75489	3.45943	14.458	6.32193
TCGA-AA-3673	2.80735	3.16993	8.43879	8.90989	4.39232	12.8096	5.67243
TCGA-AA-3526	4.64386	5.9542	11.4914	7.76818	5.12928	14.4535	5.80735
TCGA-EI-6510	2	5.16993	9.78627	6.44294	5.20945	15.5684	5.58496
TCGA-AF-6655	3.16993	4.85798	12.6989	5.32193	3.32193	14.022	5.97728
TCGA-CI-6623	2	4.52356	14.4689	6.26679	3	11.0835	5.85798
TCGA-AA-3506	1	4.58496	7.7879	5.2854	3.70044	13.8583	4.9542
TCGA-CA-5256	3.32193	4.08746	7.03342	5.90689	2.80735	9.48583	4
TCGA-AA-3664	1	2	8.72792	6.30378	4.08746	12.1199	5.20945
TCGA-CM-6161	3	3.80735	9.38154	14.5937	5.04439	10.9106	6.71425
TCGA-AA-3939	2.80735	3.32193	8.02791	7.52356	5.16993	12.7809	5.08746
TCGA-AA-3818	2.58496	3.70044	7.94251	8.3443	4.32193	13.8731	5.90689
TCGA-D5-6537	1.58496	3	12.5828	8.37069	3.70044	13.0131	6.85798
TCGA-AG-3901	5.16993	6.22882	12.0658	6.20945	3.45943	14.5771	6.22882
TCGA-AH-6903	2.32193	4.85798	11.3826	7.55459	4.45943	15.1477	6.59991
TCGA-AA-A02F	2	4.32193	9.14975	4.16993	4.64386	12.7356	4.52356
TCGA-DM-A1D6	3.70044	2.58496	9.60918	8.75154	6.04439	16.5895	6.87036
TCGA-CM-5860	3.32193	4.64386	11.6018	9.77479	4.80735	12.5302	6.39232
TCGA-AA-A00E	2.80735	2	9.87652	3.32193	3.70044	13.3525	5.24793
TCGA-AG-3581	1.58496	4	10.9196	6.6865	5.75489	13.8386	5.67243
TCGA-G4-6293	3.32193	4.16993	12.4939	9.12928	4.64386	15.094	7.32193
TCGA-A6-5664	3.45943	5.12928	8.9542	10.8734	3.16993	15.2927	7.49185
TCGA-AA-3678	2.58496	4.58496	10.8704	7.31288	4.70044	13.2223	5.88264
TCGA-AD-6890	2	4.75489	10.8025	7.24793	5.58496	13.604	5.70044
TCGA-AA-3869	4.24793	3.45943	9.12928	7.62205	4.80735	14.5752	6.16993
TCGA-AA-3979	2	4.32193	9.60918	6.71425	4.80735	10.5068	4.70044
TCGA-CA-6715	2	6.88264	7.18982	7.55459	4.58496	13.8208	5.16993
TCGA-AG-3609	4.58496	5	12.2633	4.39232	3.58496	14.906	6.12928
TCGA-AA-A00D	5.24793	3.70044	9.40514	11.3859	3.80735	12.5522	6.93074
TCGA-AA-3697	2	3.70044	11.5498	6.08746	5.20945	13.2753	5.72792
TCGA-AA-3864	3	2.80735	10.3945	7.62936	4.70044	12.0587	5.83289
TCGA-AA-3842	3	3.80735	8.95128	6.40939	2	10.5727	5.42626
TCGA-F4-6806	5.12928	5.20945	11.8826	5.9542	4.75489	14.0944	5.88264
TCGA-CA-5796	1.58496	3.45943	6.90689	8.61839	6.08746	13.083	5.2854
TCGA-AZ-6599	1.58496	7.14975	2.80735	8.29462	4.9542	17.0262	5.42626
TCGA-AA-3530	0	4.16993	5.97728	5.20945	2.32193	12.0522	4.90689
TCGA-A6-5656	3.90689	4.75489	9.83447	4.85798	2	9.03617	4.58496
TCGA-AA-3685	3.90689	5.61471	13.1724	8.40939	5.52356	13.8637	6.52356
TCGA-A6-3809	3.90689	3.32193	13.6782	5.67243	4.75489	11.7613	5.78136
TCGA-A6-6650	0	4.39232	6.75489	6.96578	4.16993	9.33985	4.16993
TCGA-EI-7004	6.53916	6.24793	14.8434	6.70044	4.24793	16.2449	7.37504
TCGA-AA-3986	3	3.16993	10.4242	8.96578	4.39232	12.4674	6.49185
TCGA-CI-6621	3.32193	4	14.9149	6.89482	4.70044	14.2578	7.10852
TCGA-AA-3949	4.58496	3.16993	10.2527	4.70044	0	13.653	6.90689
TCGA-AA-3495	2.32193	2.80735	9.07146	6.40939	4	12.3177	5.67243
TCGA-A6-3808	4.80735	4.08746	10.0782	6.10852	3.58496	12.9138	5.88264
TCGA-AA-A02Y	2	4.32193	9.22159	10.2204	7.41785	17.7134	7.20945
TCGA-CK-6747	2	4.08746	9.93811	5.2854	4.08746	15.0671	6.18982
TCGA-AF-2692	1	3.90689	11.444	6.12928	4.32193	11.8553	5.72792
TCGA-A6-6781	2.32193	2.58496	11.9133	3	0	11.6569	6.33985
TCGA-AF-5654	1.58496	3.32193	12.0396	7.46761	3.90689	13.4629	6.91886
TCGA-AA-3710	4	1	11.227	5.35755	4.08746	12.6604	6.20945
TCGA-CM-6162	5.55459	5.16993	13.4302	7.98868	6.24793	16.2196	7.19967
TCGA-AZ-4682	2.32193	5.85798	10.0688	7.21917	7.61471	13.8274	5.16993
TCGA-G4-6322	1	4.08746	12.8624	10.1254	5.55459	16.7082	8.2854
TCGA-A6-5661	1	2.58496	9.91588	7.11894	3.16993	10.2538	5.88264
TCGA-AA-3517	1	7.18982	9.59805	4.80735	4.45943	13.2672	5.04439
TCGA-AA-A01V	2.80735	3.16993	9.72281	6.82018	4.24793	15.4064	6.90689
TCGA-CK-5912	1	4.24793	11.5694	4.64386	2.58496	10.4666	5.55459
TCGA-AF-6136	2	4.80735	10.2167	6.61471	5.75489	12.2366	5.35755
TCGA-AA-A02J	1	4.45943	7.42626	6.49185	5.16993	12.5594	5.12928
TCGA-D5-6920	3	4.64386	14.3353	7.30378	5.75489	14.6789	7.10852
TCGA-CM-4752	4.45943	3.90689	9.07682	5.04439	4.52356	11.5348	4.9542
TCGA-AA-A02O	3.32193	3.80735	9.07948	7.30378	4.9542	14.6295	6.44294
TCGA-CK-6751	3.32193	5	10.5488	6.90689	4.80735	14.4712	6.44294
TCGA-AA-3858	2.32193	4.75489	8.98014	4.80735	4.39232	10.8887	4.64386
TCGA-D5-5539	3.90689	5.2854	9.42206	8.01681	5.55459	15.0518	6.44294
TCGA-DM-A28E	1	3.45943	10.3387	5.39232	6.14975	11.7871	5.04439
TCGA-D5-7000	2.80735	3.58496	11.6439	7.96	5.52356	13.8184	6.79442
TCGA-AY-A71X	1	2.80735	8.90388	8.67243	6.59991	15.1572	6.71425
TCGA-G4-6294	4.70044	4.39232	10.3185	4.80735	5	14.5252	5.90689
TCGA-AG-3611	3.45943	6.42626	6.45943	3.90689	4.75489	15.3246	4.9542
TCGA-AA-A01C	2	4.16993	7.67948	3.58496	3.90689	9.40514	3.90689
TCGA-AY-A8YK	1	5.39232	11.2848	7.02237	6.18982	13.9267	6.10852
TCGA-AA-3994	2.32193	4	9.31515	7.20945	4.58496	14.8031	6.70044
TCGA-AA-3525	2.32193	2.80735	10.2761	7.65821	5.97728	13.8454	6.49185
TCGA-A6-6140	2.32193	5.52356	9.85487	7.82655	6.10852	12.2874	5.58496
TCGA-AA-3553	4	4.64386	10.7474	4.9542	3.16993	11.3542	5.64386
TCGA-AG-3892	2.32193	4.45943	9.40514	6.30378	6.62936	12.245	5.08746
TCGA-AY-4071	2	3.58496	10.7507	6.72792	6.44294	12.2366	5.67243
TCGA-AA-A01G	1.58496	2.80735	8.71425	5.32193	4.80735	10.8796	5.08746
TCGA-CI-6619	3.90689	5.20945	12.8025	7.16993	5.35755	14.2659	6.89482
TCGA-AA-3542	2.80735	2.32193	10.5803	5.42626	3.90689	8.84549	5.20945
TCGA-CK-5914	3.70044	6.06609	11.1312	6.91886	4.08746	11.5008	5.93074
TCGA-AA-3531	1.58496	5.45943	8.08215	4.08746	4.75489	11.8226	4.58496
TCGA-AG-A02N	2	4	6.61471	6.88264	4.08746	13.5632	6.02237
TCGA-AA-A00L	0	4.45943	10.683	5.32193	4.32193	11.7636	5.72792
TCGA-AG-3587	2.58496	4.39232	9.62753	5.45943	4.24793	10.7465	5.24793
TCGA-AA-3666	1.58496	6.49185	11.1434	4.08746	5.88264	11.1662	4.52356
TCGA-AG-3582	3	4.08746	11.8891	3.16993	2.58496	10.5275	5.52356
TCGA-AG-3731	4.85798	7.13955	12.9622	8.3443	5.12928	13.5057	6.85798
TCGA-EI-6882	2	4.39232	10.8525	4.58496	6.75489	17.152	6.47573
TCGA-D5-6530	5.04439	5.49185	11.8572	7.97728	6.65821	16.4228	7.21917
TCGA-AA-3502	3.70044	4.16993	5.32193	5.20945	4.70044	15.2191	5.61471
TCGA-A6-2682	3.58496	4	10.268	4	4.90689	12.7828	5.45943
TCGA-DC-4749	3	6	9.49985	6.45943	5.45943	13.1578	5.67243
TCGA-AA-3831	2.58496	3.45943	6.50779	6.79442	5.42626	13.0706	5.55459
TCGA-AG-3592	2.80735	6.89482	14.3966	6.96578	5.9542	14.3041	6.84549
TCGA-AA-3675	2	4.16993	12.0658	4.9542	5.35755	14.0305	6.33985
TCGA-AA-3846	0	2	9.45533	4.39232	3.80735	12.93	6.16993
TCGA-CM-4748	2	3.45943	6.32193	1.58496	2	8.38802	3.70044
TCGA-CK-4947	3.45943	3.32193	7.63662	8.60363	4.75489	13.7959	6.74147
TCGA-DM-A28M	2.58496	4.85798	6.97728	5.90689	7.11894	14.8501	5.2854
TCGA-AY-A69D	1.58496	5	11.0327	8.40939	6.71425	13.5001	6.47573
TCGA-AA-A004	2.32193	5.24793	10.1472	8.33092	5	12.5524	6.45943
TCGA-AA-3977	3.80735	2.58496	9.76984	4	4.32193	10.7607	5.20945
TCGA-AA-3549	2.32193	4.39232	13.7553	2.32193	3.70044	12.7351	6.06609
TCGA-AZ-5407	2.32193	3.16993	7.67948	7.47573	4.9542	13.6877	6.42626
TCGA-AA-3663	1	3.32193	9.15228	7.2854	7.85175	14.2209	5.97728
TCGA-AG-4022	3.45943	5.70044	12.1222	7.96578	5.9542	13.6841	6.76818
TCGA-A6-A567	2	4.45943	10.1749	3.45943	2.58496	12.1296	5.88264
TCGA-AG-3608	3.45943	3.80735	9.19476	4.64386	5.16993	12.5488	5.45943
TCGA-AG-3732	1.58496	4.85798	5.85798	7.40088	5.83289	13.8249	5.67243
TCGA-AA-3837	2	2.32193	6.9542	4.52356	3.58496	11.3426	5.35755
TCGA-DC-5869	2	6.6865	11.2633	6.37504	3.70044	9.14211	5.39232
TCGA-AA-3821	1.58496	2.80735	9.01123	6.64386	5.70044	13.6897	6.39232
TCGA-G4-6323	1.58496	2.58496	3.90689	8.03342	5.24793	13.8217	6
TCGA-AA-3877	4.58496	3.58496	11.5083	9.2503	7.33985	15.4535	7.49985
TCGA-AA-A01K	4.16993	3.58496	5.61471	3.80735	2	11.3399	5.20945
TCGA-CI-6622	2	5.39232	10.7863	7.67948	6.39232	13.4029	6.39232
TCGA-CL-5917	0	6.39232	10.4888	4.80735	4.24793	12.3937	5.75489
TCGA-AG-3896	2.32193	4	8.50779	5	5.39232	11.6502	5.16993
TCGA-AG-A00Y	1	3	8.25739	5.42626	4.16993	11.23	5.64386
TCGA-AG-3727	2.32193	5.55459	7.53916	4.39232	4.52356	12.2995	5.04439
TCGA-G4-6315	1	4.08746	8.85175	7.26679	6.16993	13.0807	6.08746
TCGA-AY-6386	0	4.24793	8.47168	6.93074	4.24793	13.8979	6.74147
TCGA-AA-A00K	1	5.49185	9.77972	7.46761	5.32193	13.7435	6.58496
TCGA-AH-6643	3	4.45943	10.733	3.90689	4.32193	14.638	6.45943
TCGA-EI-6511	5.45943	8.02237	10.9403	7.72792	4.58496	14.6488	6.94251
TCGA-CM-6680	5.20945	6.52356	10.9344	7.22882	4.9542	16.5913	7.50779
TCGA-AA-A00R	3.16993	1.58496	10.4988	6.67243	3.70044	10.2784	6.47573
TCGA-RU-A8FL	3	3.32193	8.29002	4.75489	5.58496	12.0577	5.24793
TCGA-DC-6155	2.80735	1	9.34873	6.20945	6.80735	12.7975	6.06609
TCGA-D5-6924	3.16993	5.12928	9.76155	8.13443	4.70044	11.9326	6.44294
TCGA-CM-6674	4.70044	3.70044	10.4294	5.78136	5.72792	16.9021	7.30378
TCGA-CM-5863	3.90689	5.12928	12.0914	8.31288	5.72792	16.6293	8.07682
TCGA-AF-6672	1.58496	4.70044	6.50779	8.2384	5.20945	14.7862	6.6865
TCGA-AG-3594	3.70044	4.80735	8.26679	8.66534	5.80735	13.9312	6.65821
TCGA-AA-3875	3	3.80735	9.70563	5.85798	4.45943	10.8525	5.78136
TCGA-AA-3511	4	5.12928	11.0182	8.15987	5.93074	13.5975	6.87036
TCGA-AZ-4313	2.32193	3.70044	8.5157	3.32193	3.70044	13.0083	5.75489
TCGA-AZ-4684	2	3.32193	12.275	3.70044	4	11.2276	6.02237
TCGA-G4-6588	2	4	9.62388	6.08746	5.49185	14.1111	6.52356
TCGA-CK-4950	3.16993	5	9.92035	11.8313	7.2854	15.5575	7.94837
TCGA-AA-3970	2	2.32193	7.66534	5.67243	4.70044	11.7578	5.83289
TCGA-AH-6544	0	2.80735	10.7507	6.91886	6.32193	11.8074	6.2854
TCGA-CL-4957	2	6.35755	10.7347	8.11894	4.45943	14.0602	7.32193
TCGA-A6-5659	2.90689	5.53916	8.84235	8.18735	4.42626	10.3647	5.97728
TCGA-AA-3688	2	4.9542	11.2033	5.90689	5.12928	11.809	6.14975
TCGA-AG-A00H	3.80735	4.80735	10.6156	5.64386	4	9.48985	5.58496
TCGA-AG-A020	1.58496	2.80735	8.46352	4.75489	6.44294	15.0389	6.20945
TCGA-CM-6171	2	4.45943	10.9542	10.5285	6.58496	18.1269	8.9542
TCGA-AM-5821	2.58496	2.80735	12.8037	2	6.08746	15.8851	6.62936
TCGA-DC-6158	3.58496	5.08746	13.9996	5	4.24793	12.2155	6.80735
TCGA-AA-3975	2.32193	5.16993	9.19967	5.64386	4.90689	12.2228	5.88264
TCGA-A6-3810	4.16993	3	11.4929	4.39232	4.45943	11.4821	6.16993
TCGA-DM-A1HB	2.58496	2.32193	13.0284	8.83605	8.39232	15.1238	7.77479
TCGA-D5-6529	6.72792	4.39232	11.2497	9.45738	4.32193	13.101	7.82655
TCGA-AG-3605	1.58496	4.80735	8.47573	4.24793	6.02237	13.6271	5.52356
TCGA-AF-3913	1.58496	5.16993	10.1749	5.12928	5.83289	10.9046	5.2854
TCGA-G4-6627	5	4.80735	9.56796	9.83131	5.42626	13.788	7.47573
TCGA-AG-3599	2.80735	4.08746	8.83289	7.02237	3.80735	14.6291	7.42626
TCGA-AA-3956	2	3.80735	9.3443	5.88264	5.93074	11.8138	5.78136
TCGA-AA-A017	3.16993	5.70044	10.4051	5.2854	5.72792	11.7065	5.55459
TCGA-AA-3862	2.80735	3.16993	11.1929	6.44294	6.49185	11.0341	5.97728
TCGA-F4-6805	4.75489	5.24793	11.7292	5.80735	3.70044	13.2758	7.07682
TCGA-A6-5666	0	6.06609	5.55459	3.90689	3.80735	11.3565	4.70044
TCGA-AG-3574	2	4.08746	5.83289	6.49185	5.64386	13.3978	5.80735
TCGA-F4-6704	5.55459	8.83289	10.5793	13.0838	5.32193	14.344	8.20945
TCGA-AF-2691	3.32193	5.04439	7.08746	7.87652	4.24793	12.8709	6.53916
TCGA-CI-6620	3.90689	6.02237	12.9353	4.52356	4.08746	11.4089	6.18982
TCGA-AA-A02W	1.58496	4.32193	8.67596	4	3.32193	9.40727	5.12928
TCGA-CM-6170	5.12928	5.20945	12.9135	1	4.64386	12.4331	5.45943
TCGA-CM-6172	2.32193	4.58496	10.5934	5.64386	5.12928	14.0836	6.80735
TCGA-F5-6861	3.16993	4.32193	9.24079	9.61471	5.55459	12.5646	7.09803
TCGA-D5-5540	3.16993	3.90689	11.1662	5.20945	4.16993	9.49386	5.78136
TCGA-AG-4008	1.58496	4.39232	10.5718	5.55459	3.58496	11.8653	6.61471
TCGA-AA-3532	3.58496	5.20945	10.5245	6.33985	4.9542	11.1867	6.06609
TCGA-A6-4105	5	4.70044	13.7601	5.75489	5.16993	13.2643	7.15987
TCGA-EI-7002	2.32193	4.39232	9.02237	6.02237	4.58496	12.4315	6.33985
TCGA-D5-6538	3.32193	5.04439	7.14975	9.27845	5.83289	12.1969	6.33985
TCGA-CI-6624	3.32193	4.75489	11.809	7.66534	5.67243	13.5616	7.29462
TCGA-NH-A50T	2.80735	3.70044	9.59991	5.45943	5.45943	8.69697	5
TCGA-F5-6465	5.58496	6.20945	12.6954	6.76818	4.64386	13.4039	7.22882
TCGA-AA-3660	3.70044	7.97154	9.57365	5.78136	6.02237	13.3256	5.70044
TCGA-AD-6963	2.32193	7.15987	11.9586	6.18982	5.70044	13.1137	6.45943
TCGA-AA-3494	3.32193	3.45943	11.6004	3.16993	3.16993	11.2324	6.24793
TCGA-DM-A0X9	3.90689	5.04439	7.86419	8.59619	6.06609	15.1359	7.12928
TCGA-D5-6931	3.45943	5.61471	10.697	8.9571	5.45943	13.7246	7.45943
TCGA-DM-A28G	2	5.08746	5.32193	8.65821	5.16993	13.5676	6.47573
TCGA-AF-A56N	4.24793	5.20945	12.1134	6.24793	4.9542	11.9363	6.62936
TCGA-A6-6137	1.58496	4.16993	10.774	5.39232	4.75489	12.8011	6.65821
TCGA-AA-3544	4.70044	3.90689	10.7364	3.45943	5.16993	13.9966	6.33985
TCGA-CM-5341	5.83289	4.08746	10.9024	4.24793	3.16993	10.3129	6.02237
TCGA-EI-6884	3	4.64386	11.0868	6.42626	5.78136	13.1084	6.71425
TCGA-AA-3662	5.52356	4.85798	11.5372	7.3837	6.40939	13.0025	6.78136
TCGA-AA-3971	1	5.58496	10.0238	5.78136	5.20945	11.7903	6
TCGA-CK-4948	5.24793	5.39232	12.7438	6.47573	4.64386	12.7288	7.12928
TCGA-AZ-5403	3.32193	5.12928	12.2515	6.79442	5	10.8956	6.55459
TCGA-F4-6463	4.16993	4.9542	9.48985	7.97154	4.08746	12.5957	7.15987
TCGA-EI-6514	4.39232	5.75489	7.18982	6.02237	3.32193	13.395	6.52356
TCGA-4T-AA8H	0	2.32193	7.16993	4.70044	5	13.0163	6.12928
TCGA-AA-3681	3	3.45943	9.30606	3.45943	4.16993	12.3412	6.02237
TCGA-A6-A565	4.85798	5.61471	11.7288	9.09276	7.49185	15.7106	7.76155
TCGA-CM-6677	2.80735	5.08746	10.0196	5.64386	3.58496	11.7069	6.52356
TCGA-AG-4001	4.52356	5.70044	8.61839	4.90689	3.58496	11.8065	5.97728
TCGA-AF-2693	3.16993	3.80735	11.0458	6.79442	6.06609	14.2945	7.29462
TCGA-AA-3692	4.9542	4.52356	9.79928	5.35755	4.85798	12.808	6.42626
TCGA-NH-A8F7	1.58496	6.80735	8.41785	6.06609	4.90689	12.5641	6
TCGA-AH-6644	2.58496	4.58496	12.5157	7.06609	5.64386	13.4961	7.45121
TCGA-AG-3909	3.32193	5.12928	5.55459	6.2854	4.16993	11.1466	5.52356
TCGA-D5-6533	2.32193	5.16993	10.6008	7.20945	5.49185	11.6742	6.53916
TCGA-D5-6930	4.08746	4.64386	10.7557	6.49185	5.45943	16.6211	7.93074
TCGA-AF-4110	3	6.04439	13.1482	6.49185	5.93074	14.6381	7.46761
TCGA-AA-3520	4.24793	4.70044	10.3129	5.85798	5.70044	11.5358	6.04439
TCGA-F5-6811	6.06609	5.12928	9.90238	6.04439	3.90689	13.103	6.94251
TCGA-AA-3966	3.80735	5.12928	14.2831	5.42626	4.52356	13.8171	7.69349
TCGA-A6-4107	3.32193	4.80735	7.90689	7.33985	5.32193	12.8378	6.52356
TCGA-WS-AB45	4.24793	5.16993	14.0824	3	3.70044	13.3961	7.08746
TCGA-A6-6141	2	5.08746	3.58496	9.12928	4.90689	14.5628	6.82018
TCGA-AY-5543	3	5.12928	11.8353	6.39232	6.20945	14.2549	7.15987
TCGA-AA-3815	5	3.58496	9.96723	6.45943	4.75489	12.4727	6.90689
TCGA-AG-3593	2	3.16993	7.88264	4.80735	3.80735	11.7172	6.20945
TCGA-G4-6295	4.45943	4.32193	9.64566	5.42626	3.58496	10.2538	6.14975
TCGA-AA-A029	1	1.58496	5.75489	5.83289	4.32193	11.5008	6.12928
TCGA-AF-A56K	3.80735	5.04439	13.6211	6.37504	5	11.5551	7.07682
TCGA-DC-6157	2.32193	4.90689	7.78136	7.5157	5.2854	11.1567	6.10852
TCGA-AH-6897	1	4.32193	10.5382	6.24793	3	8.85798	6.39232
TCGA-D5-6536	1.58496	8.24317	13.0037	5.2854	6.14975	17.4683	7.70736
TCGA-DM-A1D4	2.80735	4.45943	8.17991	7.74819	7.17991	14.4467	6.76818
TCGA-AA-3851	1.58496	7.2384	8.46761	7.87652	4.9542	13.689	6.90689
TCGA-F5-6814	4.08746	5.85798	10.3902	14.0052	4.32193	9.88417	8.18488
TCGA-CM-6169	3.90689	4.70044	8.48382	4.80735	3.90689	11.8162	6.12928
TCGA-AG-3612	2.58496	5	11.0828	3.32193	4.16993	9.53528	5.42626
TCGA-AG-A036	4.16993	5.39232	10.4979	5.42626	5.32193	10.8478	5.88264
TCGA-EI-6507	3.90689	3.90689	11.1898	5.85798	9.33539	17.7381	7.26679
TCGA-A6-6138	4.80735	2.32193	12.3143	8.53138	5.20945	12.5238	8.08746
TCGA-F4-6856	3.16993	4.08746	7.67243	6.85798	5.42626	13.9594	6.88264
TCGA-AA-3841	1	4.58496	8.23362	4	4.08746	10.5498	5.52356
TCGA-AA-A00Z	2.80735	5.80735	9.17243	7.31288	3	12.1306	7.22882
TCGA-A6-5662	3.45943	5.12928	6.98868	3	5.2854	13.7076	5.49185
TCGA-A6-6142	5.72792	4.52356	13.0274	5.45943	3.16993	10.8424	7.15987
TCGA-AG-3885	3	4.75489	7.06609	6.37504	6.47573	11.2033	5.42626
TCGA-AA-3679	1.58496	4.80735	9.35975	5.42626	5.90689	10.9773	5.72792
TCGA-AG-A00C	1	4.24793	9.35755	3.90689	6.39232	13.4271	6
TCGA-AZ-4308	4.45943	6.32193	10.8696	5.70044	6.52356	12.1855	6.02237
TCGA-AA-3982	3	3.80735	6.49185	5.93074	4.39232	10.6555	5.80735
TCGA-CM-6168	4.64386	5.88264	9.9263	6.55459	4.39232	12.3482	6.83289
TCGA-AA-3866	4.08746	1.58496	11.327	3.16993	3	11.3332	6.89482
TCGA-CM-6165	5.49185	4.52356	10.403	7.01123	5.75489	13.7446	7.26679
TCGA-AA-3867	3.80735	3.58496	7.65105	4.64386	4.16993	10.9337	5.85798
TCGA-CM-6678	3.70044	4.70044	10.4083	6.10852	5.04439	12.7979	6.9542
TCGA-A6-6652	1	4.45943	11.2609	4.58496	5.16993	10.6129	6.08746
TCGA-D5-5537	2.32193	6.04439	3.45943	7.91886	4.45943	12.3554	6
TCGA-AA-3655	4.39232	5.78136	9.30606	9.60548	6.18982	11.703	6.89482
TCGA-AG-3893	2	5.75489	7.7211	5.04439	4.85798	11.875	5.80735
TCGA-AA-3488	3	3.45943	8.24793	3.70044	5.16993	10.7549	5.42626
TCGA-AA-A024	1	2.80735	5.24793	6.58496	5.20945	13.4856	6.59991
TCGA-DM-A1D7	2.32193	6.08746	10.1111	7.11894	7.5157	16.2169	7.33985
TCGA-AA-3860	4.24793	3.58496	10.0334	4.75489	5.49185	11.838	6.26679
TCGA-A6-6648	2	5.20945	10.1331	7.64386	5.55459	13.3951	7.35755
TCGA-AZ-6603	3.70044	7.42626	10.1293	5.45943	4.70044	12.2992	6.32193
TCGA-AA-3941	2.32193	4.39232	5.70044	9.94251	5.58496	12.6062	7.03342
TCGA-DC-4745	3.58496	6.55459	11.0861	5.24793	5.42626	11.4625	6.12928
TCGA-AA-A01D	4.52356	4.52356	10.9151	7.25739	9.45327	14.2953	6.61471
TCGA-NH-A6GB	2.80735	3.70044	11.4231	3.45943	2.80735	13.4998	7.53916
TCGA-A6-5667	5.04439	6.49185	10.9114	6.08746	4.08746	10.3912	6.40939
TCGA-AA-3516	2.80735	2.80735	11.6711	3.90689	5.04439	11.327	6.52356
TCGA-AA-3968	2	4.80735	10.1202	4.70044	5.24793	11.31	6.10852
TCGA-AA-3518	2.80735	3.32193	9.51964	3.80735	5.85798	12.8414	6.22882
TCGA-AD-6965	2.32193	4.24793	5.20945	6.26679	5.2854	11.6983	5.78136
TCGA-G5-6641	2	5.80735	7.74147	7.09803	6.02237	15.0191	7.09803
TCGA-AG-3726	2.80735	5.35755	9.20457	2.58496	6.45943	14.2454	5.83289
TCGA-D5-6540	3	2.80735	11.5981	4.16993	5	17.1501	8.42626
TCGA-AA-A00O	2.58496	4.9542	10.7549	5.67243	4.58496	12.9491	7.22882
TCGA-AG-3598	2.58496	3.16993	8.62205	3.80735	4.70044	11.1338	5.97728
TCGA-AF-3911	3	4.70044	12.0151	5.20945	5.45943	12.1007	6.88264
TCGA-AA-A00J	4.58496	3.32193	11.2324	3.16993	3.80735	14.1676	7.45121
TCGA-D5-6532	3.58496	4	8.79766	5.75489	5.97728	13.88	6.89482
TCGA-AG-A032	1	3.70044	6.37504	5.39232	5.45943	10.3365	5.49185
TCGA-AA-3556	1.58496	3	7.17991	4.85798	3.58496	16.1887	7.9542
TCGA-D5-6539	2	4.9542	8.15482	7.61471	7.09803	13.0283	6.62936
TCGA-D5-6898	5.12928	4.75489	12.2641	7.61471	4.39232	11.1687	7.63662
TCGA-3L-AA1B	2.80735	5.2854	7.52356	8.67948	4.85798	13.3711	7.5157
TCGA-A6-A566	6.35755	4.75489	11.4466	7.94837	6.24793	13.785	7.80735
TCGA-AG-A011	3.80735	8.6865	11.4605	6.33985	5.45943	12.1573	6.61471
TCGA-CM-5862	3	5.12928	11.2935	3.32193	4.08746	10.0056	6.02237
TCGA-AA-A01T	1	6.42626	10.3399	5.72792	7.09803	10.5859	5.64386
TCGA-A6-2680	3.16993	4.08746	9.77808	5.42626	6.06609	11.3214	6.2854
TCGA-NH-A6GC	3	4.90689	3.32193	7.87036	6.52356	15.4053	6.71425
TCGA-EI-6881	3.16993	3.90689	13.8945	4.58496	5.85798	12.7781	7.3837
TCGA-D5-6923	2.80735	6.14975	14.8089	4.58496	5.85798	13.2248	7.39232
TCGA-AA-3514	1.58496	6.33985	4.52356	6.93074	4.52356	12.1447	6.12928
TCGA-D5-6927	4.45943	3.80735	13.1702	4.08746	6.02237	11.8443	6.79442
TCGA-AA-3496	5.20945	4.52356	12.7015	6.39232	4.64386	13.0269	8.00562
TCGA-DM-A282	2	5.39232	6.37504	8.46761	5.80735	12.0549	6.65821
TCGA-DC-6681	4.08746	6.12928	7.41785	7.49985	6.89482	13.8479	6.67243
TCGA-AH-6549	1.58496	5.55459	9.88417	5.42626	4.90689	12.7127	6.9542
TCGA-CA-6716	1	3.80735	8.85798	4.75489	5.24793	13.0624	6.84549
TCGA-DM-A28C	0	4.32193	5.85798	6.14975	7.18982	11.3015	5.49185
TCGA-G4-6297	3.45943	4.08746	9.76155	5.83289	5.12928	12.2143	7.02237
TCGA-5M-AATE	1.58496	5.9542	6.44294	4.90689	3.90689	10.0848	5.61471
TCGA-D5-6926	3.80735	5.78136	12.0053	3.90689	4	12.6373	7.14975
TCGA-DY-A0XA	4.39232	5.04439	7.98299	3.70044	6.24793	11.4605	5.39232
TCGA-AA-3930	4	3.58496	10.0993	3.16993	4.75489	9.41151	5.70044
TCGA-AA-3510	5.67243	3	10.2958	4.45943	4.80735	12.1898	6.98868
TCGA-CM-6163	2.58496	5.45943	11.2889	7.52356	6.06609	11.7503	7.22882
TCGA-QG-A5YV	0	5.35755	10.4221	5.9542	5.88264	13.0338	7.12928
TCGA-G4-6309	2.58496	4.58496	11.2282	7.01123	7.70044	10.9388	6.47573
TCGA-G4-6626	2	6.16993	12.1886	3.90689	6.12928	11.6843	6.26679
TCGA-F4-6854	3.80735	5.80735	11.5445	8.00562	5.83289	12.8978	7.76818
TCGA-AA-3562	4.52356	6.10852	7.97154	6.59991	5.04439	11.1163	6.32193
TCGA-AU-3779	3	4.80735	12.6048	3.58496	4.90689	11.7224	6.83289
TCGA-AA-3833	3.16993	1.58496	9.40514	5.67243	5.58496	11.9833	7.14975
TCGA-A6-2678	3.58496	4.16993	8.52748	5.32193	4.39232	12.8281	7.11894
TCGA-AA-3552	1.58496	4.52356	6.32193	3.70044	4.80735	11.4099	5.67243
TCGA-AA-A00Q	4.32193	3.45943	8.55075	4.16993	4.85798	8.43463	5.42626
TCGA-AD-6548	4.90689	3.70044	12.7457	5.75489	5.83289	13.9723	8.02791
TCGA-EI-6506	2.58496	6.59991	13.7522	8.224	6.62936	13.2254	8.07682
TCGA-AG-3883	5.12928	4.85798	10.196	2.32193	3.90689	10.1799	5.83289
TCGA-AA-3713	3.32193	4.45943	11.1293	8.3837	7.41785	12.8488	7.58496
TCGA-EF-5830	3.32193	6.80735	7.65821	7.58496	5.61471	12.7503	6.85798
TCGA-D5-6929	4.32193	5.42626	6.62936	4.08746	5.08746	12.9642	6.08746
TCGA-G5-6572	4.39232	5.2854	5.08746	9.75989	6.26679	11.6348	6.64386
TCGA-AG-3890	2.32193	4.08746	7.88264	4.45943	5.32193	10.7607	5.93074
TCGA-G4-6303	4.64386	5.97728	12.2639	6.32193	5.72792	12.1821	7.31288
TCGA-F4-6807	4.58496	5.42626	11.2854	4.45943	3.70044	13.7698	7.8009
TCGA-G5-6235	5.70044	6.64386	8.94837	8.37938	6.82018	13.0565	7.10852
TCGA-AA-3811	2.58496	5.58496	7.84549	4.16993	5.32193	11.1793	5.80735
TCGA-CM-4750	3.80735	5.70044	8.66178	4.24793	3.32193	9.74819	6.10852
TCGA-AA-3980	2.32193	2.32193	7	6.32193	4.70044	9.67772	6.45943
TCGA-A6-A56B	1.58496	3.58496	6.24793	3	4.85798	8.12412	4.70044
TCGA-CM-4744	3.32193	4	8.37069	5.24793	4.52356	11.1	6.65821
TCGA-CA-6717	4.64386	5.32193	9.35094	8.12412	3.16993	12.1567	8.16993
TCGA-AH-6547	2.80735	4.90689	9.89178	8.31288	6.64386	14.0179	7.96
TCGA-AD-A5EK	2.80735	3.16993	8.77479	7.44294	6.12928	14.1569	7.9542
TCGA-F4-6460	2.32193	6.16993	8.56986	6.18982	5.83289	13.0432	6.89482
TCGA-AG-A014	2	4.32193	9.46352	1	4.16993	12.0782	6.10852
TCGA-CM-5349	4.64386	4.16993	10.0293	7.11894	6.53916	12.3966	7.31288
TCGA-AA-A01Q	3	3.90689	9.33092	2.80735	7.64386	13.632	6.08746
TCGA-AG-3898	2.80735	5.04439	8	4.32193	3.90689	9.51175	5.9542
TCGA-QG-A5Z2	3	3.58496	10.4574	6.18982	5.39232	14.4404	8.25267
TCGA-A6-2684	2.32193	4.52356	7.82655	0	2.80735	9.91289	5.2854
TCGA-AZ-6605	4.58496	5.85798	13.2541	5.52356	4.90689	12.032	7.67243
TCGA-CM-6167	4.58496	6.88264	8.13955	5.72792	4.16993	12.4221	6.93074
TCGA-DM-A1D9	2.58496	4.90689	6.84549	11.0701	6.76818	13.4707	8.04439
TCGA-AA-A00F	2	4.64386	11.0112	6.06609	6.65821	11.3208	6.89482
TCGA-T9-A92H	1	3.45943	3.45943	6.76818	5	11.1649	6.26679
TCGA-AZ-6606	2.80735	4.58496	10.1421	4.39232	4.24793	13.6834	7.70044
TCGA-A6-2679	0	3.80735	8.21432	2	7.46761	11.4868	5.20945
TCGA-DY-A1H8	3.16993	4.80735	5.97728	2.58496	6.32193	14.5558	6.02237
TCGA-A6-6782	6.12928	7.20945	9.10591	6.82018	5.20945	12.7341	7.19967
TCGA-A6-3807	3.58496	4	9.08215	3	3.45943	11.4553	6.76818
TCGA-DC-6683	4	4.90689	8.89178	6.40939	4.9542	10.6202	6.85798
TCGA-AD-6964	6.49185	5.12928	7.53916	6.61471	4.08746	13.14	7.60733
TCGA-G4-6314	4	4.9542	9.22882	4.32193	4	10.716	6.65821
TCGA-F4-6855	4	4.45943	7.03342	4.90689	4.16993	12.7394	7.05528
TCGA-AG-A023	3.90689	5.04439	6.89482	4.64386	5.35755	13.7969	6.84549
TCGA-CM-5861	1	2	8.56605	2.58496	6.74147	16.1295	7.3837
TCGA-D5-6932	5.16993	4.24793	11.7698	5.12928	5.78136	12.6152	7.53916
TCGA-DC-6682	2.32193	3.45943	8.16993	6.88264	3.45943	10.8857	7.67243
TCGA-CM-6676	3.16993	3.70044	7.89482	6.26679	4.58496	10.3912	6.91886
TCGA-AD-6895	5	3.80735	10.1774	5.97728	5.55459	13.586	7.91886
TCGA-AA-3973	2.32193	4.58496	7.8009	3	3.58496	9.80735	6
TCGA-CM-6164	4.32193	6.82018	8.53138	4.64386	4.70044	12.571	6.78136
TCGA-DM-A280	4.64386	3.16993	7.98299	6.55459	7.06609	14.4398	7.60733
TCGA-AA-A03J	3.16993	3.32193	9.74315	5.61471	7.21917	12.2825	6.98868
TCGA-AA-3856	2.32193	3.90689	10.3117	4.52356	4.85798	10.7322	6.9542
TCGA-CM-5868	6.35755	5.97728	9.36194	6.2854	6.06609	11.5784	6.79442
TCGA-CM-6675	2.80735	2.32193	6.20945	9.79604	6.52356	12.3435	7.87036
TCGA-A6-2681	5.64386	5.32193	10.0196	7.12928	5.32193	12.3276	7.73471
TCGA-DM-A1D0	2.32193	4.64386	3.58496	7.18982	6.94251	14.4003	6.84549
TCGA-AA-3812	4	5.39232	6.90689	4.32193	5.12928	11.4589	6.20945
TCGA-AF-2687	4.08746	6.84549	12.2237	8.49185	4.58496	12.1354	8.56224
TCGA-CM-6679	4.70044	6.39232	10.0967	3.90689	4.85798	11.4833	6.65821
TCGA-AG-A01J	1	4.39232	5.72792	6.33985	5.70044	11.6266	6.64386
TCGA-G4-6310	1	3.58496	5.58496	4.24793	3.70044	10.0741	6.2854
TCGA-DM-A28H	4	4	9.18239	5.78136	6.37504	10.6891	6.71425
TCGA-A6-2676	3.70044	2.80735	8.11894	7.30378	5.9542	10.3641	7.14975
TCGA-AG-4005	2.58496	3.70044	9.47168	2.80735	3.45943	9.59805	6.55459
TCGA-F4-6703	7.13955	6.56986	13.5409	5.35755	4	15.057	9.06878
TCGA-CK-5913	3.80735	2	12.8958	4.45943	9.76321	15.1299	7.74147
TCGA-AA-3554	4.70044	3	11.6402	3.45943	6.94251	12.0644	6.97728
TCGA-AG-A025	1.58496	4.39232	8.35755	4.45943	5.45943	10.9218	6.58496
TCGA-F5-6702	4.45943	5.64386	9.43045	4.32193	4.70044	12.7682	7.31288
TCGA-AD-6889	0	2.32193	12.4638	8.20457	5.20945	11.8933	9.12928
TCGA-AG-3902	4.58496	4.85798	8.47573	9.66	7.40088	14.3881	8.43463
TCGA-CA-5797	3.58496	6.74147	7.8392	8.97154	6.56986	11.3168	7.17991
TCGA-AA-3548	1.58496	3	5.58496	4.70044	5.64386	11.0369	6.32193
TCGA-A6-2675	6.06609	4.75489	9.43045	6.49185	5.16993	13.3149	8.07146
TCGA-EI-6513	4	4.85798	9.60733	4.90689	6.45943	11.0519	6.64386
TCGA-DM-A0XD	3.70044	4	11.0478	4.80735	6.16993	14.1376	8.04985
TCGA-AG-A01N	1.58496	5.55459	7.88264	5.2854	6.62936	10.8376	6.26679
TCGA-D5-6922	3.80735	6.40939	8.224	7.22882	5.04439	10.5594	7.11894
TCGA-G4-6320	3.45943	5.49185	6.91886	11.3449	5.78136	12.4393	8.50779
TCGA-AG-3600	3.90689	2.58496	7.04439	3.45943	5.32193	10.3945	6.26679
TCGA-DM-A0XF	3.70044	5.88264	9.47776	9.34873	6.87036	13.0308	8.25267
TCGA-F5-6813	6.65821	4.80735	7.96578	6.37504	5.85798	11.4676	7.06609
TCGA-QL-A97D	2.58496	3	11.2639	7.54689	8.88264	9.94983	7.01123
TCGA-AG-3878	4.85798	5.58496	9.91439	4	6.02237	13.5581	7.30378
TCGA-A6-5660	4	5.16993	7.10852	6.04439	3.80735	10.5245	7.14975
TCGA-F5-6571	5.52356	5.32193	7.61471	4.64386	4.75489	12.9516	7.26679
TCGA-CA-6719	4.70044	4.85798	9.19967	3.90689	4.58496	10.5555	6.79442
TCGA-CK-4951	2.80735	2.58496	11.9549	5.58496	4.75489	13.627	9.04712
TCGA-AD-6899	7.03342	5.39232	11.9607	6.35755	6.24793	13.1256	8.21432
TCGA-AZ-6598	5.83289	3.45943	9.27612	2.32193	5.04439	14.9726	7.79442
TCGA-AA-A01P	5.20945	3.80735	8.44294	4.39232	3.16993	11.9005	7.79442
TCGA-CM-4743	3.90689	3.58496	7.16993	7.76818	3.70044	9.32643	7.60733
TCGA-EI-6508	3.80735	5.55459	7.27612	6.47573	5.93074	13.2269	7.52356
TCGA-G4-6317	3.32193	7.02237	4.39232	4	5.61471	11.4944	5.64386
TCGA-G4-6625	3.90689	5.2854	9.25739	6.78136	5.93074	12.158	7.7211
TCGA-AA-3715	2.58496	3.45943	8.45121	5.93074	4.52356	12.3796	8.10852
TCGA-CM-5348	7.85175	4.90689	10.5897	9.81858	6.35755	12.3772	8.76818
TCGA-CM-5344	5.2854	6.22882	9.57365	4.70044	5	9.83447	6.62936
TCGA-AD-5900	2.32193	2.80735	11.3281	2.58496	7.53138	12.9771	7.13955
TCGA-F4-6569	5.49185	6.16993	6.49185	6	5.08746	14.8754	7.91886
TCGA-A6-2672	2.80735	3.45943	11.744	1.58496	4.24793	11.6724	7.41785
TCGA-CA-5255	2	2.58496	6.78136	11.6211	7.33092	13.3103	8.99435
TCGA-NH-A8F8	5.55459	3.58496	7.70044	2.58496	4.45943	11.4893	6.74147
TCGA-AA-A02K	4.45943	5.45943	9.22882	9.40727	8.84862	10.0741	6.98868
TCGA-EI-6885	4.75489	4.85798	14.061	4.90689	4.64386	11.5736	8.47978
TCGA-F4-6461	4.80735	5.39232	5.49185	6.55459	5.75489	16.3186	8.31741
TCGA-AZ-4616	3.90689	5.32193	12.7275	5	5.45943	12.314	8.20457
TCGA-QG-A5YW	2.80735	4.64386	9.23122	5.64386	5.35755	12.7004	7.97728
TCGA-AM-5820	4.85798	5.2854	7.96	5.78136	5.72792	10.8978	6.98868
TCGA-AA-A01S	1.58496	2.32193	5.39232	2	3.80735	10.9993	6.52356
TCGA-CK-6748	5.45943	4.39232	12.1267	4	3.70044	12.7224	8.57365
TCGA-AG-4007	3.70044	4.85798	6.58496	5.88264	5.12928	11.6055	7.2384
TCGA-AA-A01Z	3.16993	2.80735	9.35535	3.45943	5.64386	11.2282	7.14975
TCGA-CM-4747	4.52356	5	6.56986	4.39232	6.02237	11.1911	6.42626
TCGA-AG-A02G	1	5.12928	8.77149	6.87036	4.58496	12.0802	8.29921
TCGA-DY-A1DC	4.32193	4.16993	7.09803	5.67243	4.85798	10.6786	7.21917
TCGA-AA-3848	2.58496	5.55459	6.35755	2	6.45943	11.1325	5.55459
TCGA-A6-A5ZU	4.75489	3.90689	3.70044	3.16993	3.45943	12.2912	6.82018
TCGA-A6-6654	4.80735	5.04439	12.6364	5.12928	4.08746	12.9361	8.9542
TCGA-AA-A02E	2.58496	3.32193	7.09803	3.80735	4	10.0512	6.9542
TCGA-AF-A56L	3.70044	3.70044	10.2574	4.24793	5.97728	10.3554	7.12928
TCGA-AG-3999	3	3.90689	10.0688	4.16993	5.12928	8.8009	6.83289
TCGA-D5-5541	5.80735	6.30378	10.23	5.35755	4.32193	12.7461	8.2384
TCGA-A6-5665	1	5.12928	9.31061	1	3.16993	10.7781	6.84549
TCGA-NH-A50V	5.24793	4.32193	14.7202	1	4.9542	10.5108	7.33985
TCGA-QG-A5YX	0	2.58496	7.78136	5.52356	5.12928	12.3006	8.09803
TCGA-A6-6651	6.18982	6.49185	11.1189	7.21917	4	11.7908	8.75489
TCGA-D5-5538	5.61471	4.32193	10.102	6.93074	7.55459	14.9937	8.72451
TCGA-AG-3882	1	4.75489	8.55459	2.32193	4.80735	11.4388	6.89482
TCGA-AZ-6608	1	6.14975	9.70217	3.45943	6.2854	11.9458	6.9542
TCGA-G4-6311	4.58496	6.26679	11.5873	5.35755	5.49185	11.5018	7.90087
TCGA-G4-6307	2	4.52356	6.24793	6.71425	5.70044	11.6147	7.55459
TCGA-DM-A288	3.70044	3.80735	8.14466	2	6.53916	11.0049	6.24793
TCGA-AA-A00A	4.39232	2	11.7415	3.90689	10.4367	11.1312	6.65821
TCGA-AG-3742	2	5.9542	10.4273	5.08746	6.06609	11.6631	7.66534
TCGA-EI-6509	5.70044	5.2854	2	11.2033	4.24793	11.5608	8.30834
TCGA-CM-4751	4.58496	4.75489	9.84235	5.64386	5.52356	12.3351	8.24317
TCGA-AG-3728	4.9542	5.49185	8.56986	3.70044	5.39232	11.0403	6.98868
TCGA-A6-2677	1	4.45943	6.84549	4.32193	3.58496	8.30834	6.76818
TCGA-CM-6166	3.45943	6.26679	8.92184	6.16993	3.45943	9.86419	7.89482
TCGA-A6-6649	3.80735	6.39232	11.5579	7.18982	8.10852	14.6171	8.74147
TCGA-A6-5657	3.16993	6.52356	10.8819	9.07948	5.55459	10.0861	8.51964
TCGA-AA-3492	3.16993	3.32193	8.97441	5	7.81378	13.624	7.88874
TCGA-F5-6812	7.14975	4.80735	9.27612	6.97728	5.32193	11.0934	8.23362
TCGA-A6-6653	1.58496	1.58496	12.6649	4.32193	7.26679	15	9.32867
TCGA-CA-5254	3.16993	6.39232	5.12928	4.70044	4.45943	14.4585	7.96
TCGA-D5-6535	3.70044	4.58496	8.78136	4.75489	6.20945	11.357	7.48382
TCGA-AU-6004	4.39232	3.70044	13.6619	3.90689	5.39232	14.6639	9.55651
TCGA-AA-3489	5.61471	7.40088	12.378	3.16993	4.16993	12.233	8.17991
TCGA-AA-3543	4.64386	2.58496	9.33762	3	8.36632	10.8146	6.59991
TCGA-G4-6628	4.80735	4.52356	10.3587	3.80735	5.39232	12.5321	8.14975
TCGA-F5-6863	4	5.04439	8.15482	7.55459	6.47573	9.13955	7.36632
TCGA-AY-4070	2.32193	3.80735	9.47978	9.40514	4.16993	11.158	9.68825
TCGA-A6-2671	4.80735	4.85798	9.69349	3.32193	4.90689	10.2204	7.33985
TCGA-DM-A285	4.52356	6.12928	6.94251	5.49185	4.64386	10.3826	7.3837
TCGA-EF-5831	2.58496	3.45943	7.80735	2.32193	4.9542	11.3772	7.30378
TCGA-D5-6928	5.32193	5.16993	9.10591	6.32193	6.97728	13.4031	8.42206
TCGA-DC-6154	5.78136	9.88111	2.32193	5.72792	6.04439	14.2011	6.78136
TCGA-DY-A1DE	6.26679	5.55459	8.33092	4.64386	5.70044	9.15987	6.83289
TCGA-AA-A02R	4.70044	4.39232	3.80735	5.78136	4.08746	10.6475	7.40088
TCGA-AZ-4323	4.85798	6.39232	9.89936	7.39232	4.90689	10.9084	8.64386
TCGA-D5-6531	6.02237	4.24793	9.90839	4.70044	4.58496	11.5718	8.49985
TCGA-DM-A28A	2.58496	4.90689	8.96867	4.32193	5.88264	12.3357	8.02791
TCGA-A6-2683	2.80735	2	5.42626	2.58496	5.61471	10.8849	6.93074
TCGA-AG-4021	4.08746	6.18982	10.8122	5.2854	5.78136	13.3813	8.81378
TCGA-AZ-4615	6.47573	1	5.24793	7.72792	6.55459	12.9823	8.79116
TCGA-BM-6198	3.58496	5.32193	13.3531	5.35755	9.33539	13.2196	8.41785
TCGA-G4-6321	1.58496	3.45943	6.04439	9.00843	10.1137	14.0434	8.37504
TCGA-F5-6464	7.66534	3.70044	9.23362	4	6.87036	11.1215	7.56224
TCGA-AG-3584	4.58496	4.32193	10.2538	6.04439	6.35755	10.6055	8.30378
TCGA-AZ-4614	2.58496	4.90689	8.84862	6.04439	6.45943	11.1849	8.14466
TCGA-A6-6780	6.45121	2.16993	8.18239	5.37504	8.34207	13.0816	8.22641
TCGA-AA-3870	5.32193	4.64386	7.62936	3.16993	4.08746	10.9166	7.81378
TCGA-AG-3881	4.16993	6	9.10852	1.58496	7.98868	13.664	7.20945
TCGA-DY-A1DD	3.80735	7.13955	8.07146	7.11894	5.75489	11.7678	8.52356
TCGA-AZ-6600	5.64386	5.9542	9.57554	5.32193	5.85798	13.031	8.81057
TCGA-AG-3575	1.58496	3.32193	10.7524	7.53138	2.80735	12.8343	10.9737
TCGA-D5-6534	6.82018	7	9.98584	4.58496	5.72792	13.2435	8.65464
TCGA-CA-6718	3.90689	3.70044	8.12928	4.39232	4.45943	11.9531	8.76155
TCGA-F4-6459	6.14975	6.16993	10.2252	7.08746	4	11.6944	9.58496
TCGA-EI-6883	3.70044	6.59991	5.04439	9.49785	11.8738	13.4849	7.45121
TCGA-AG-A026	2.58496	5.12928	7.70044	3.58496	5.72792	8.67948	6.97728
TCGA-AZ-6607	3.90689	4.08746	12.1315	5.20945	3.80735	13.3061	10.4252
TCGA-AA-A01X	2.58496	4.32193	7.30378	3	4.85798	12.7271	8.3966
TCGA-A6-2685	5.88264	6.80735	6.85798	6.2854	9.2854	12.1023	7.31288
TCGA-NH-A50U	6	6.24793	7.56224	3.80735	7.06609	12.0835	7.53138
TCGA-DM-A1D8	2.32193	5.08746	8.02237	6.04439	6.80735	10.0265	7.93074
TCGA-F5-6864	7.61471	5.97728	7.79442	3.70044	6.14975	11.7461	7.76818
TCGA-G4-6586	5	5.20945	8.62205	3.58496	8.43463	14.5946	8.25267
TCGA-AF-2690	7.31288	7.35755	11.043	3.16993	4.24793	11.9848	8.74483
TCGA-CK-5916	4.90689	3	6.75489	4.64386	7.74147	12.0815	8.00562
TCGA-F4-6809	6.08746	7	7.25739	7.08746	6.94251	11.5304	8.26679
TCGA-DT-5265	5.80735	4.75489	8.92184	7.63662	6.74147	15.6533	10.3977
TCGA-AA-A01R	6.20945	4.9542	10.1396	0	6.16993	10.0954	6.96578
TCGA-G5-6233	6.06609	3.90689	9.74315	5.52356	6.91886	12.0825	8.96867
TCGA-AZ-6601	6.24793	4.24793	8.32643	4.24793	6.24793	12.6396	8.85175
TCGA-NH-A6GA	5.2854	6.55459	8	3.80735	6.49185	14.132	8.78136
TCGA-5M-AAT6	5.83289	5.64386	6.35755	2.58496	4.80735	11.144	7.94251
TCGA-AD-6901	5.9542	7.06609	5.20945	5.24793	5.93074	11.7168	8.11894
TCGA-DM-A1DB	3.70044	6.40939	2	7.66534	7.5157	12.2848	8.01123
TCGA-DY-A1DG	2.80735	6.40939	11.0954	2.58496	5.80735	11.2125	8.56605
TCGA-DC-6156	6.76818	5.16993	4.80735	3	4.32193	12.1889	8.42206
TCGA-G4-6304	4.52356	3.58496	3.70044	2.32193	4.90689	9.11374	7.22882
TCGA-D5-6541	6.62936	8.60733	5.61471	5.45943	5.35755	13.0062	8.79442
TCGA-4N-A93T	1	4.45943	6.88264	5	7.07682	10.8202	8.47168
TCGA-DM-A28F	2.80735	5.12928	9.08215	5.16993	6.93074	8.78463	8.27146
TCGA-AA-3952	4.90689	6.78136	7.45943	3	9.96867	10.3652	6.72792
TCGA-QG-A5Z1	5.83289	5.39232	6.18982	5.32193	5.88264	10.8665	8.72451
TCGA-5M-AAT4	1.58496	6.87036	7.58496	4	5.2854	9.47978	8.30834
TCGA-DM-A1DA	4.64386	4.75489	3.58496	6.47573	5.70044	9.08215	8.30834
TCGA-AY-6196	8.18982	7.25739	4	4.52356	4.9542	13.9243	9.224
TCGA-A6-2686	6.12928	6.14975	10.0861	5.04439	11.5231	11.7838	8.35755
TCGA-EI-6917	6.75489	3.90689	4.85798	6.30378	7.33092	12.1383	9.76984
TCGA-G4-6299	5.12928	5.12928	4.9542	1.58496	5.70044	11.9311	8.82655
TCGA-DY-A1DF	4.16993	7.42626	7.58496	1.58496	7.18982	7	7.35755
TCGA-DM-A1HA	2.58496	7.06609	4.45943	3.90689	7.34873	13.9611	9.76155
TCGA-AG-A002	1.58496	3.45943	10.8329	0	6.76818	14.6172	10.9144
TCGA-F4-6570	6.39232	3.80735	5.12928	3	12.4924	12.4307	9.41785
